# Supplementary material for: Implementation of Systematic Bioanalysis of Antibody–Drug Conjugates for Preclinical Pharmacokinetic Study of Ado-Trastuzumab Emtansine (T-DM1) in Rats
Source: MDPI journal article supplement (doi:10.3390/pharmaceutics15030756), 2023-02-24
Supplement: s1 [file s1]

Table S1. Calibration Standards of ELISAs for T-DM1 in Rat

| T-DM1<br>(Total Trastuzumab ELISA)<br>(N=10) |                    |      |      | T-DM1<br>(DM1-Conjugated Trastuzumab ELISA)<br>(N=8) |      |      | Trastuzumab<br>(Total Trastuzumab ELISA)<br>(N=1) |      |
|----------------------------------------------|--------------------|------|------|------------------------------------------------------|------|------|---------------------------------------------------|------|
| Nominal Concentration<br>(ng/mL)             | Mean $\pm$ SD      | %CV  | %RE  | Mean $\pm$ SD                                        | %CV  | %RE  | Mean                                              | %RE  |
| 25.0 <sup>a</sup>                            | 23.2 $\pm$ 6.2     | 26.8 | -7.0 | 24.5 $\pm$ 8.6                                       | 35.0 | -1.9 | 27.1                                              | 8.4  |
| 50.0 <sup>a</sup>                            | 49.0 $\pm$ 1.5     | 3.1  | -2.0 | 51.3 $\pm$ 5.9                                       | 11.5 | 2.6  | 49.4                                              | -1.3 |
| 100                                          | 101.2 $\pm$ 6.2    | 6.1  | 1.2  | 98.2 $\pm$ 7.7                                       | 7.9  | -1.8 | 96.3                                              | -3.7 |
| 250                                          | 253.6 $\pm$ 8.5    | 3.4  | 1.4  | 252.5 $\pm$ 11.5                                     | 4.6  | 1.0  | 250.6                                             | 0.3  |
| 500                                          | 497.0 $\pm$ 7.0    | 1.4  | -0.6 | 496.4 $\pm$ 13.1                                     | 2.6  | -0.7 | 498.8                                             | -0.2 |
| 1000                                         | 1005.3 $\pm$ 28.4  | 2.8  | 0.5  | 995.5 $\pm$ 11.8                                     | 1.2  | -0.4 | 1023.9                                            | 2.4  |
| 2000                                         | 1967.2 $\pm$ 37.6  | 1.9  | -1.6 | 2034.1 $\pm$ 74.1                                    | 3.6  | 1.7  | 1935.3                                            | -3.2 |
| 4000                                         | 4231.3 $\pm$ 255.1 | 6.0  | 5.8  | 3928.8 $\pm$ 198.0                                   | 5.0  | -1.8 | 4114.8                                            | 2.9  |
| 6000                                         | 5783.4 $\pm$ 313.8 | 5.4  | -3.6 | 6061.3 $\pm$ 170.1                                   | 2.8  | 1.0  | 5927.5                                            | -1.2 |

<sup>a</sup>: Anchor point; acceptance criteria does not apply.

Table S2. Accuracy and Precision of ELISAs for T-DM1 in Rat

| Total Trastuzumab ELISA (N=20, 8 runs) |                                  |                    |      |      |                              | DM1-Conjugated Trastuzumab ELISA (N=18, 7 runs) |      |      |                              |
|----------------------------------------|----------------------------------|--------------------|------|------|------------------------------|-------------------------------------------------|------|------|------------------------------|
| Quality Control                        | Nominal Concentration<br>(ng/mL) | Mean $\pm$ SD      | %CV  | %RE  | Total Error<br>( %RE  + %CV) | Mean $\pm$ SD                                   | %CV  | %RE  | Total Error<br>( %RE  + %CV) |
| LLOQ                                   | 100                              | 97.6 $\pm$ 9.0     | 9.2  | -2.4 | 11.6                         | 95.5 $\pm$ 11.5                                 | 12.0 | -4.5 | 16.5                         |
| LQC                                    | 300                              | 294.9 $\pm$ 19.8   | 6.7  | -1.7 | 8.4                          | 286.7 $\pm$ 48.1                                | 16.8 | -4.4 | 21.2                         |
| MQC                                    | 1000                             | 991.8 $\pm$ 81.9   | 8.3  | -0.8 | 9.1                          | 907.6 $\pm$ 81.4                                | 9.0  | -9.2 | 18.2                         |
| HQC                                    | 3000                             | 2921.3 $\pm$ 333.2 | 11.4 | -2.6 | 14.0                         | 2733.9 $\pm$ 285.8                              | 10.5 | -8.9 | 19.3                         |
| ULOQ                                   | 6000                             | 5818.1 $\pm$ 699.2 | 12.0 | -3.0 | 15.0                         | 5585.0 $\pm$ 470.8                              | 8.4  | -6.9 | 15.3                         |

Table S3. Dilution Linearity of ELISAs for T-DM1 in Rat

| Total Trastuzumab ELISA |                               |                     |      |       | DM1-Conjugated Trastuzumab ELISA |     |      |
|-------------------------|-------------------------------|---------------------|------|-------|----------------------------------|-----|------|
| Dilution factor         | Nominal Concentration (ng/mL) | Mean $\pm$ SD       | %CV  | %RE   | Mean $\pm$ SD                    | %CV | %RE  |
| 1:200                   | 1000000                       | 896741 $\pm$ 142571 | 15.9 | -10.3 | 952347 $\pm$ 64966               | 6.8 | -4.8 |
| 1:1000                  | 1000000                       | 1025909 $\pm$ 66696 | 6.5  | 2.6   | 937656 $\pm$ 28807               | 3.1 | -6.2 |
| 1:5000                  | 1000000                       | 954359 $\pm$ 79046  | 8.3  | -4.6  | 926524 $\pm$ 26398               | 2.8 | -7.3 |

Table S4. Hook Effect of ELISAs for T-DM1 in Rat

| Total Trastuzumab ELISA |                                              |                                | DM1-Conjugated Trastuzumab ELISA |
|-------------------------|----------------------------------------------|--------------------------------|----------------------------------|
| Dilution Factor         | Nominal Concentration After Dilution (ng/mL) | Observed Concentration (ng/mL) | Observed Concentration (ng/mL)   |
| No Dilution             | 1000000                                      | >ULOQ                          | >ULOQ                            |
| 1:10                    | 100000                                       | >ULOQ                          | >ULOQ                            |
| 1:100                   | 10000                                        | >ULOQ                          | >ULOQ                            |

>ULOQ: Raw OD result is greater than raw OD result of the ULOQ in calibration standard (>6000.0 ng/mL)

Table S5. Matrix Effects (Selectivity) of ELISAs for T-DM1 in Rat

| Total Trastuzumab ELISA       |                                   |                                   |       | DM1-Conjugated Trastuzumab ELISA  |                                   |       |
|-------------------------------|-----------------------------------|-----------------------------------|-------|-----------------------------------|-----------------------------------|-------|
| Blank                         |                                   | LLOQ                              |       | Blank                             |                                   | LLOQ  |
| Nominal Concentration (ng/mL) |                                   | 0.0                               |       | 0.0                               |                                   | 100.0 |
| Individual unit ID            | Observed<br>Concentration (ng/mL) | Observed<br>Concentration (ng/mL) | %RE   | Observed<br>Concentration (ng/mL) | Observed<br>Concentration (ng/mL) | %RE   |
| 1                             | BLQ                               | 100.1                             | 0.1   | BLQ                               | 93.9                              | -6.1  |
| 2                             | BLQ                               | 110.2                             | 10.2  | BLQ                               | 95.9                              | -4.1  |
| 3                             | BLQ                               | 78.0                              | -22.0 | BLQ                               | 71.8                              | -28.2 |
| 4                             | BLQ                               | 108.3                             | 8.3   | BLQ                               | 108.8                             | 8.8   |
| 5                             | BLQ                               | 97.1                              | -2.9  | BLQ                               | 97.7                              | -2.3  |
| 6                             | BLQ                               | 107.4                             | 7.4   | BLQ                               | 95.8                              | -4.2  |
| 7                             | BLQ                               | 109.1                             | 9.1   | BLQ                               | 90.1                              | -9.9  |
| 8                             | BLQ                               | 119.0                             | 19.0  | BLQ                               | 96.1                              | -3.9  |
| 9                             | BLQ                               | 89.0                              | -11.0 | BLQ                               | 98.6                              | -1.4  |
| 10                            | BLQ                               | 105.1                             | 5.1   | BLQ                               | 68.2                              | -31.8 |

BLQ: Below the Limit of Quantification (&lt;100.0 ng/mL)

Table S6. Stability of ELISAs for T-DM1 in Rat

Table S6-1. Total Trastuzumab

|                               | Room temperature stability (24 hours) |                | Freeze/Thaw stability (5 cycles) |               | Long-term stability (-80°C, 31 days) |               |
|-------------------------------|---------------------------------------|----------------|----------------------------------|---------------|--------------------------------------|---------------|
| Nominal Concentration (ng/mL) | 300.0                                 | 3000.0         | 300.0                            | 3000.0        | 300.0                                | 3000.0        |
| Mean ± SD                     | 303.4 ± 10.0                          | 3030.0 ± 121.7 | 344.9 ± 9.4                      | 3107.1 ± 79.4 | 338.7 ± 13.2                         | 3282.7 ± 69.7 |
| %CV                           | 3.3                                   | 4.0            | 2.7                              | 2.6           | 3.9                                  | 2.1           |
| %RE                           | 1.1                                   | 1.0            | 15.0                             | 3.6           | 12.9                                 | 9.4           |

Table S6-2. DM1-Conjugated Trastuzumab

|                               | Room temperature stability (24 hours) |                | Freeze/Thaw stability (5 cycles) |                | Long-term stability (-80°C, 32 days) |               |
|-------------------------------|---------------------------------------|----------------|----------------------------------|----------------|--------------------------------------|---------------|
| Nominal Concentration (ng/mL) | 300.0                                 | 3000.0         | 300.0                            | 3000.0         | 300.0                                | 3000.0        |
| Mean ± SD                     | 242.5 ± 11.2                          | 2933.8 ± 195.9 | 262.8 ± 9.0                      | 2834.6 ± 347.0 | 285.3 ± 6.4                          | 2541.2 ± 57.2 |
| %CV                           | 4.6                                   | 6.7            | 3.4                              | 12.2           | 2.2                                  | 2.3           |
| %RE                           | -19.2                                 | -2.2           | -12.4                            | -5.5           | -4.9                                 | -15.3         |

Table S7. Calibration Standards of LC–MS/MS for DM1 in Rat

|                               | Calibration Standards <sup>a</sup> |           |           |            |            |              |              |              |
|-------------------------------|------------------------------------|-----------|-----------|------------|------------|--------------|--------------|--------------|
| Nominal Concentration (ng/mL) | 2.0                                | 5.0       | 10.0      | 20.0       | 50.0       | 150.0        | 250.0        | 400.0        |
| Mean ± SD                     | 2.0 ± 0.1                          | 5.1 ± 0.4 | 9.7 ± 0.8 | 19.5 ± 1.4 | 50.3 ± 4.2 | 157.8 ± 11.4 | 253.3 ± 12.7 | 390.7 ± 19.6 |
| %CV                           | 4.1                                | 7.4       | 8.6       | 7.3        | 8.3        | 7.2          | 5.0          | 5.0          |
| %RE                           | 0.0                                | 1.7       | -3.3      | -2.4       | 0.6        | 5.2          | 1.3          | -2.3         |

<sup>a</sup> N=7/concentration

Table S8. Accuracy and Precision of LC–MS/MS for DM1 in Rat

| Quality Control <sup>a</sup>  | LLOQ      | LQC       | MQC         | HQC          |
|-------------------------------|-----------|-----------|-------------|--------------|
| Nominal Concentration (ng/mL) | 2.0       | 5.0       | 100.0       | 300.0        |
| Mean ± SD                     | 1.9 ± 0.2 | 5.1 ± 0.4 | 105.6 ± 8.4 | 319.4 ± 21.7 |
| %CV                           | 10.6      | 8.6       | 7.9         | 6.8          |
| %RE                           | -2.8      | 2.4       | 5.6         | 6.5          |

<sup>a</sup> Total 3 runs were performed for accuracy and precision (N=6/concentration/run).

Table S9. Stability of LC–MS/MS for DM1 in Rat

|                               | Room temperature stability<br>(4 hours) |             | Freeze/Thaw stability<br>(3 cycles) |              | Long-term stability<br>(-80°C, 7 days) |              | Post-preparative stability<br>(4°C, 29 hours) |              |
|-------------------------------|-----------------------------------------|-------------|-------------------------------------|--------------|----------------------------------------|--------------|-----------------------------------------------|--------------|
| Nominal Concentration (ng/mL) | 5.0                                     | 300.0       | 5.0                                 | 300.0        | 5.0                                    | 300.0        | 5.0                                           | 300.0        |
| Mean ± SD                     | 4.3 ± 0.1                               | 310.1 ± 5.2 | 4.5 ± 0.2                           | 305.3 ± 14.8 | 4.6 ± 0.3                              | 301.1 ± 22.8 | 4.4 ± 0.2                                     | 331.4 ± 22.6 |
| %CV                           | 2.7                                     | 1.7         | 4.6                                 | 4.8          | 6.2                                    | 7.6          | 3.9                                           | 6.8          |
| %RE                           | -13.3                                   | 3.4         | -9.3                                | 1.8          | -7.3                                   | 0.4          | -12.0                                         | 10.5         |
